# Supplementary material for: Terpenoid compounds from the fruits of Solanum virginianum
Source: publisher site journal article supplement (doi:10.1515/znc-2023-0028), 2023-09-25
Supplement: Supplementary file 1 [file j_znc-2023-0028_suppl_001.docx]

**Terpenoid compounds from the fruits of *Solanum virginianum***

Yan Liu, Shuang Liu, Zhen-Peng Xu, Si-Yi Wang, Yi-Kai Jiang, Wei Guan, Juan Pan, Hai-Xue Kuang*, and Bing-You Yang*

*Yan Liu, Heilongjiang University of Chinese Medicine, Harbin, China, E-mail: lifeliuyan@163.com*

*Hai-Xue Kuang, Heilongjiang University of Chinese Medicine, Harbin, China, E-mail:* [hxkuang@yahoo.com](mailto:hxkuang@yahoo.com)

*Bing-You Yang, Heilongjiang University of Chinese Medicine, Harbin, China, E-mail:* [ybywater@163.com](mailto:ybywater@163.com)

Key Laboratory of Basic and Application Research of Beiyao (Heilongjiang University of Chinese Medicine), Ministry of Education

**Supplemenary Material**

Table S1. 13C-NMR data of compounds **3**-**9** (CD3OD)

Table S2. 13C-NMR data of compounds **10** (taraxerol) (CDCL3)-**11** (huzhangoside C) (Pyridine-d5)

Figure S1. HR-ESI-MS spectrum of compound **1**

Figure S2. 1H-NMR spectrum of compound **1**

Figure S3. 13C-NMR spectrum of compound **1**

Figure S4. DEPT-135 spectrum of compound **1**

Figure S5. HSQC spectrum of compound **1**

Figure S6. 1H-1H COSY spectrum of compound **1**

Figure S7. HMBC spectrum of compound **1**

Figure S8. NOESY spectrum of compound **1**

Figure S9. HR-ESI-MS spectrum of compound **2**

Figure S10. 1H-NMR spectrum of compound **2**

Figure S11. 13C-NMR spectrum of compound **2**

Figure S12. DEPT-135 spectrum of compound **2**

Figure S13. HSQC spectrum of compound **2**

Figure S14. 1H-1H COSY spectrum of compound **2**

Figure S15. HMBC spectrum of compound **2**

Figure S16. Chemical structures of compounds **3**-**11**

Table S1. 13C-NMR data of compounds **3-9** (CD3OD)

| **NO.** | **3** | **4** | **5** | **6** | **7** | **8** | **9** |
| --- | --- | --- | --- | --- | --- | --- | --- |
| **1** | 40.7 | 37.3 | 37.0 | 42.4 | 37.1 | 40.7 | 169.6 |
| **2** | 46.4 | 48.1 | 49.9 | 50.7 | 48.3 | 46.5 | 119.3 |
| **3** | 65.3 | 202.4 | 63.8 | 201.2 | 202.0 | 65.3 | 151.4 |
| **4** | 45.6 | 125.4 | 48.0 | 127.2 | 126.2 | 45.7 | 135.1 |
| **5** | 77.8 | 170.1 | 78.7 | 167.3 | 165.8 | 77.8 | 131.9 |
| **6** | 78.9 | 52.4 | 119.1 | 80.0 | 56.8 | 78.9 | 21.3 |
| **7** | 133.0 | 26.8 | 200.7 | 131.5 | 129.0 | 131.2 |  |
| **8** | 134.7 | 37.8 | 101.4 | 135.3 | 138.1 | 136.1 |  |
| **9** | 78.8 | 75.5 | 212.9 | 77.3 | 77.6 | 69.6 |  |
| **10** | 21.8 | 19.9 | 26.6 | 21.2 | 21.2 | 24.2 |  |
| **11** | 27.6 | 29.1 | 26.7 | 24.7 | 27.5 | 27.5 |  |
| **12** | 26.2 | 27.6 | 30.0 | 23.4 | 28.0 | 26.2 |  |
| **13** | 27.5 | 25.0 | 32.5 | 19.5 | 23.7 | 27.1 |  |
| **1'** | 102.6 | 102.1 | 98.6 | 102.8 | 103.0 |  | 49.3 |
| **2'** | 75.3 | 75.2 | 75.3 | 75.2 | 75.2 |  | 42.8 |
| **3'** | 78.2 | 78.2 | 78.6 | 78.1 | 77.8 |  | 73.9 |
| **4'** | 71.8 | 71.9 | 71.7 | 71.7 | 71.4 |  | 42.8 |
| **5'** | 78.0 | 77.9 | 77.8 | 78.0 | 75.2 |  | 87.6 |
| **6'** | 62.8 | 63.0 | 62.9 | 62.8 | 64.7 |  |  |
| **7'** |  |  |  |  |  |  | 77.1 |
| **8'** |  |  |  |  |  |  | 83.2 |
| **9'** |  |  |  |  |  |  | 19.7 |
| **10'** |  |  |  |  |  |  | 16.3 |
| **1''** |  |  |  |  | 172.7 |  | 103.0 |
| **2''** |  |  |  |  | 20.8 |  | 75.1 |
| **3''** |  |  |  |  |  |  | 78.1 |
| **4''** |  |  |  |  |  |  | 71.6 |
| **5''** |  |  |  |  |  |  | 78.0 |
| **6''** |  |  |  |  |  |  | 62.8 |

Table S2. 13C-NMR data of compounds **10** (taraxerol) (CDCL3)-**11** (huzhangoside C) (Pyridine-d5)

| **NO.** | **10** | **11** | **NO.** | **10** | **11** | **NO.** | **11** |
| --- | --- | --- | --- | --- | --- | --- | --- |
| **1** | 37.9 | 38.9 | **23** | 28.1 | 28.1 | **4'''** | 70.1 |
| **2** | 27.3 | 26.8 | **24** | 15.6 | 17.1 | **5'''** | 65.2 |
| **3** | 79.2 | 88.5 | **25** | 15.6 | 15.6 | **1''''** | 95.5 |
| **4** | 39.1 | 39.5 | **26** | 30.1 | 17.4 | **2''''** | 73.7 |
| **5** | 55.7 | 56.0 | **27** | 26.0 | 26.0 | **3''''** | 78.6 |
| **6** | 18.9 | 18.4 | **28** | 30.0 | 176.4 | **4''''** | 70.7 |
| **7** | 35.3 | 33.0 | **29** | 33.5 | 33.0 | **5''''** | 77.9 |
| **8** | 38.9 | 39.8 | **30** | 21.5 | 23.6 | **6''''** | 69.0 |
| **9** | 48.9 | 47.9 | **1'** |  | 106.0 | **1'''''** | 104.7 |
| **10** | 37.8 | 36.9 | **2'** |  | 76.9 | **2'''''** | 75.2 |
| **11** | 17.6 | 23.6 | **3'** |  | 79.7 | **3'''''** | 76.4 |
| **12** | 35.9 | 122.7 | **4'** |  | 71.4 | **4'''''** | 78.1 |
| **13** | 37.7 | 144.0 | **5'** |  | 66.9 | **5'''''** | 77.0 |
| **14** | 158.2 | 42.0 | **1''** |  | 101.3 | **6'''''** | 61.1 |
| **15** | 117.0 | 28.1 | **2''** |  | 71.9 | **1''''''** | 102.6 |
| **16** | 36.8 | 23.2 | **3''** |  | 81.1 | **2''''''** | 72.4 |
| **17** | 38.1 | 46.9 | **4''** |  | 72.7 | **3''''''** | 72.6 |
| **18** | 49.4 | 41.5 | **5''** |  | 69.8 | **4''''''** | 73.8 |
| **19** | 41.5 | 46.1 | **6''** |  | 18.5 | **5''''''** | 70.2 |
| **20** | 29.0 | 30.6 | **1'''** |  | 104.5 | **6''''''** | 18.4 |
| **21** | 33.8 | 33.9 | **2'''** |  | 72.6 |  |  |
| **22** | 33.2 | 32.4 | **3'''** |  | 68.7 |  |  |

Figure S1. HR-ESI-MS spectrum of compound **1**

Figure S2. 1H-NMR spectrum of compound **1**


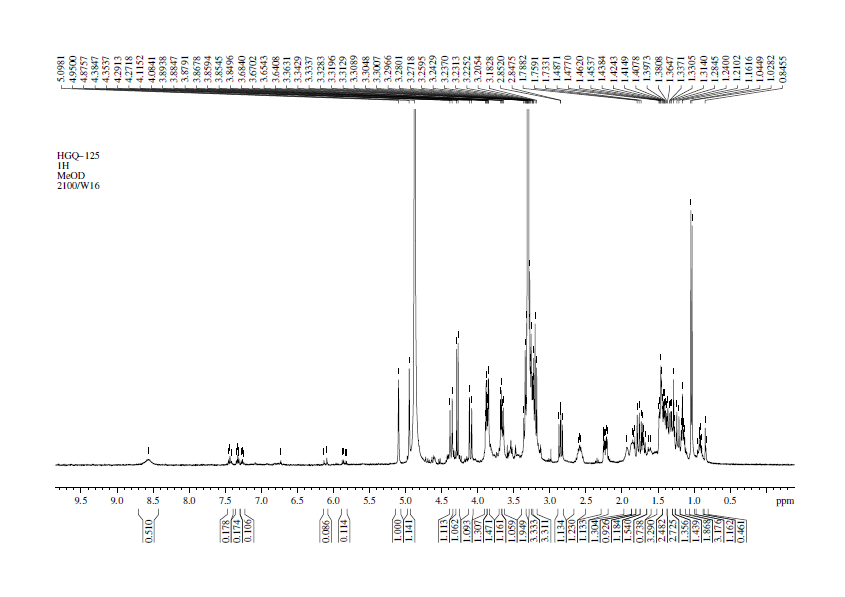


Figure S3. 13C-NMR spectrum of compound **1**


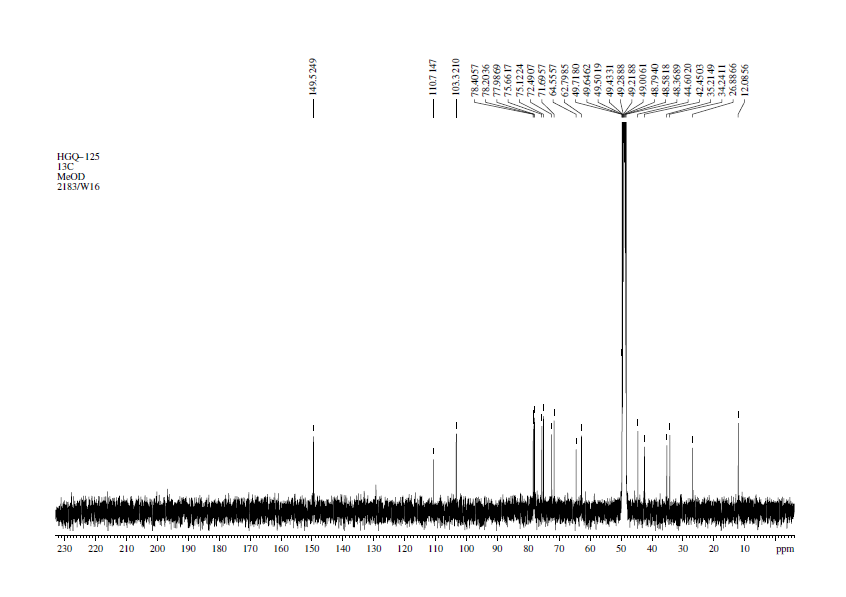


Figure S4. DEPT-135 spectrum of compound **1**


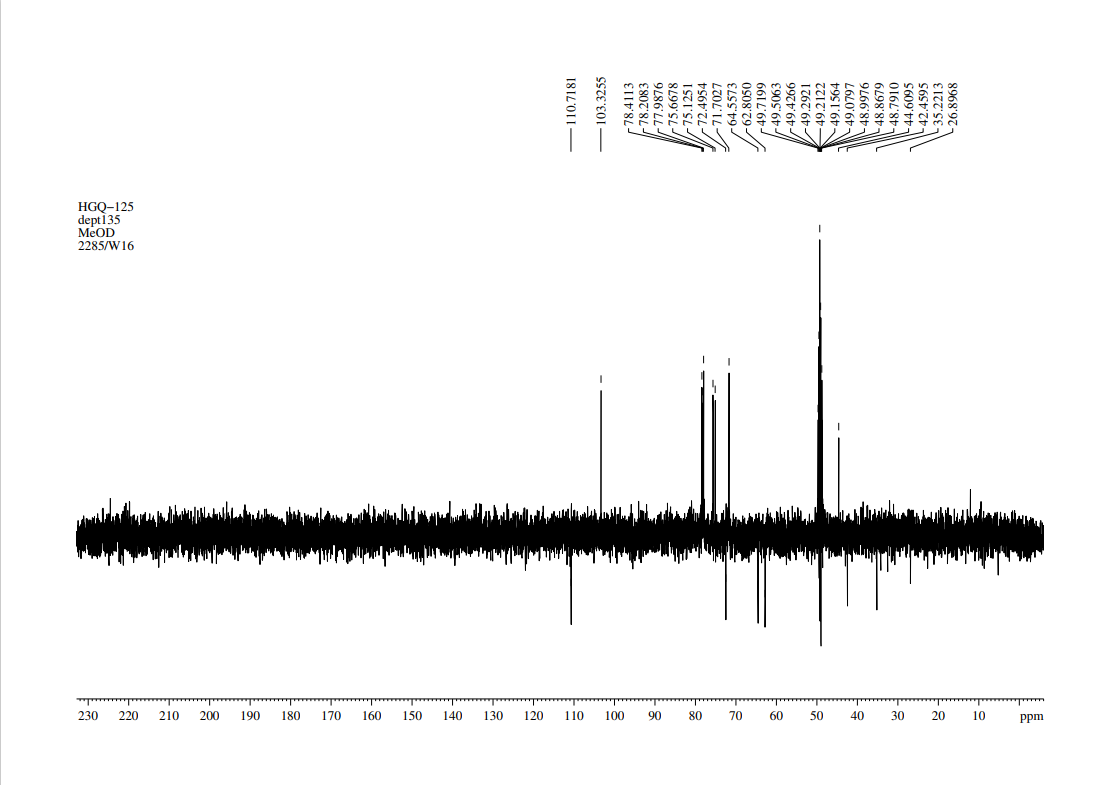


Figure S5. HSQC spectrum of compound **1**


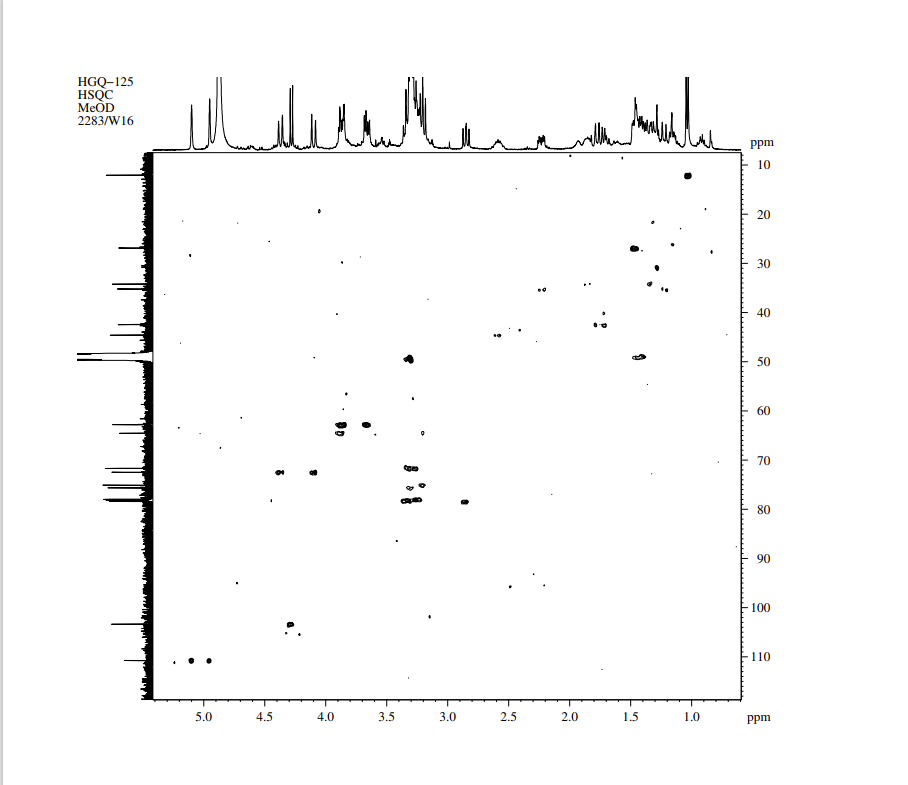


Figure S6. 1H-1H COSY spectrum of compound **1**


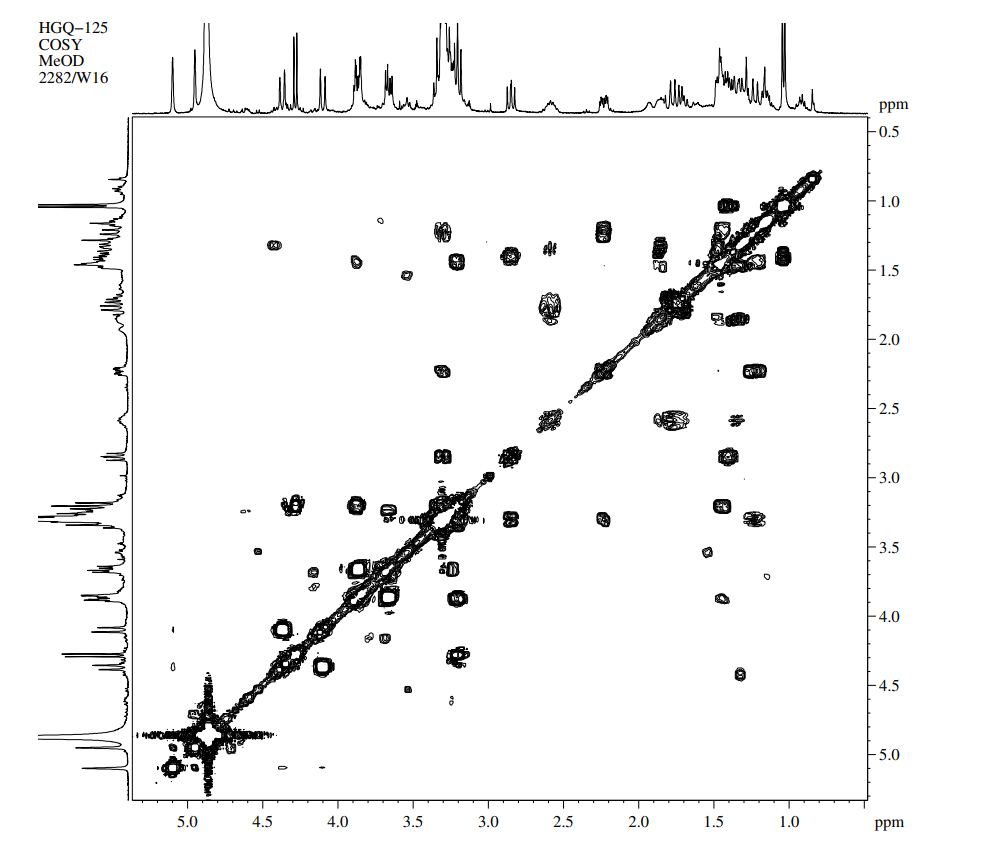


Figure S7. HMBC spectrum of compound **1**


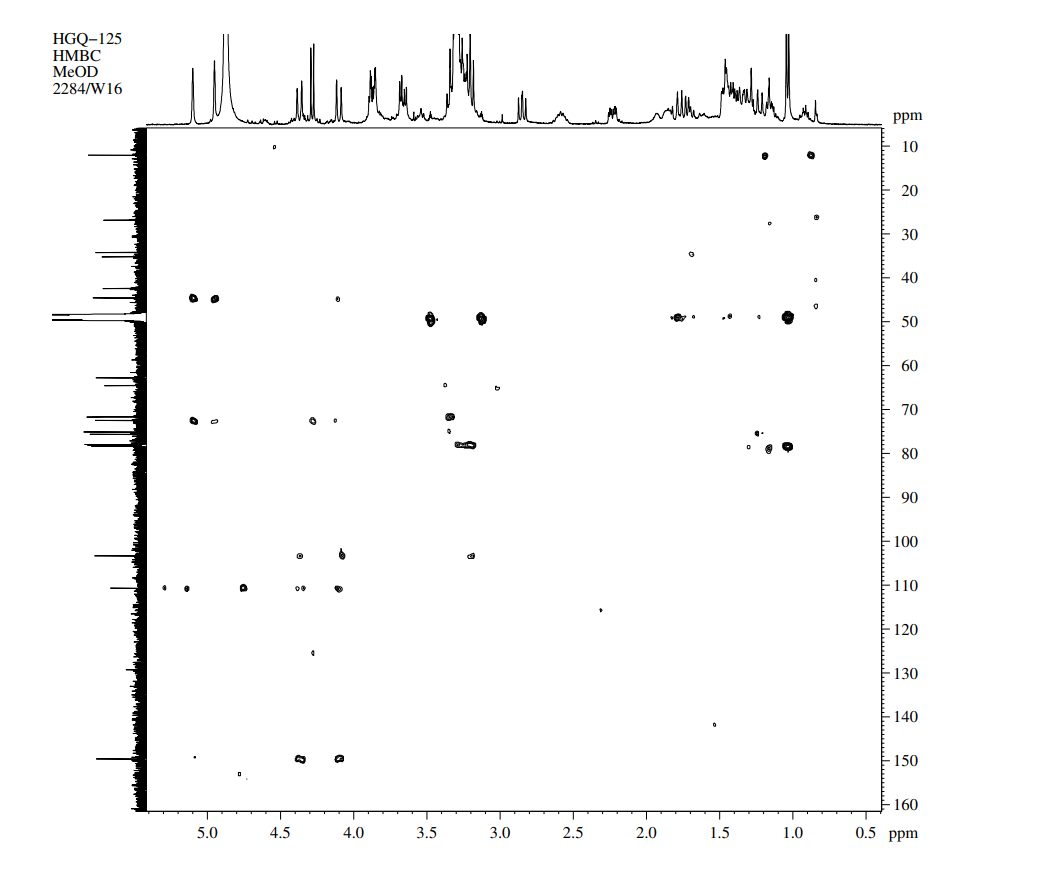


Figure S8. NOESY spectrum of compound **1**


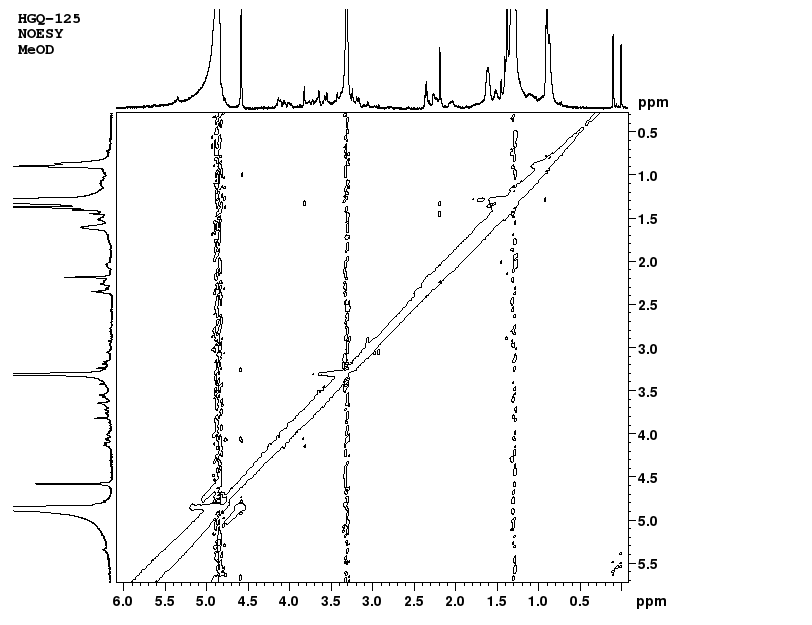


Figure S9. HR-ESI-MS spectrum of compound **2**

Figure S10. 1H-NMR spectrum of compound **2**


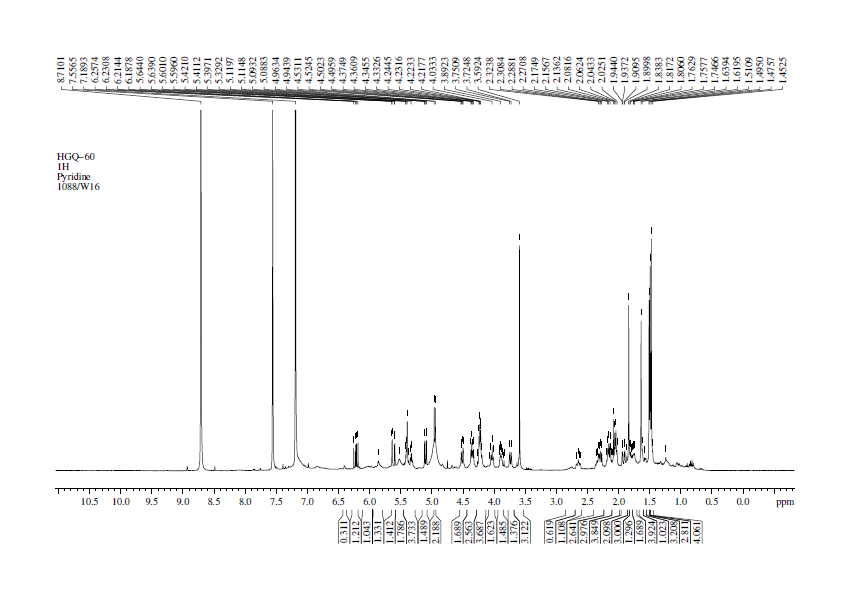


Figure S11. 13C-NMR spectrum of compound **2**


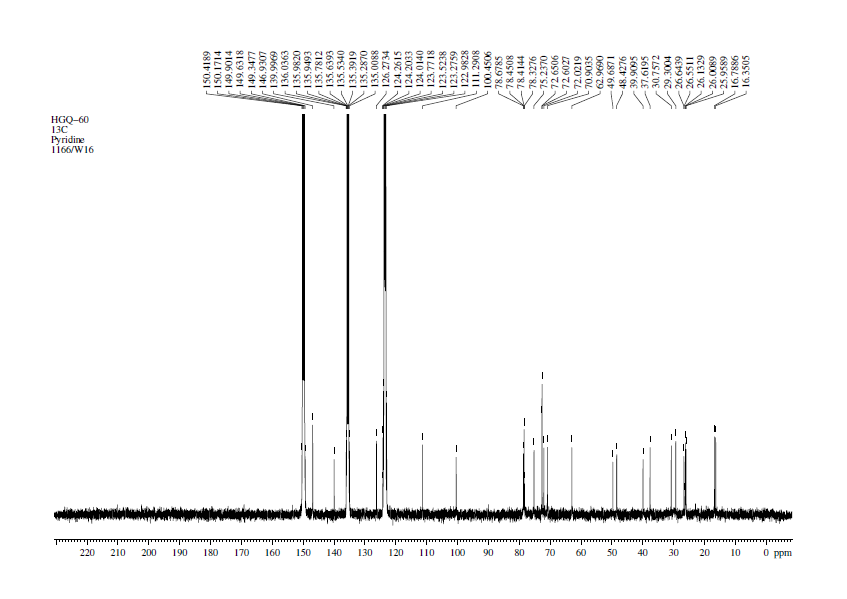


Figure S12. DEPT-135 spectrum of compound **2**


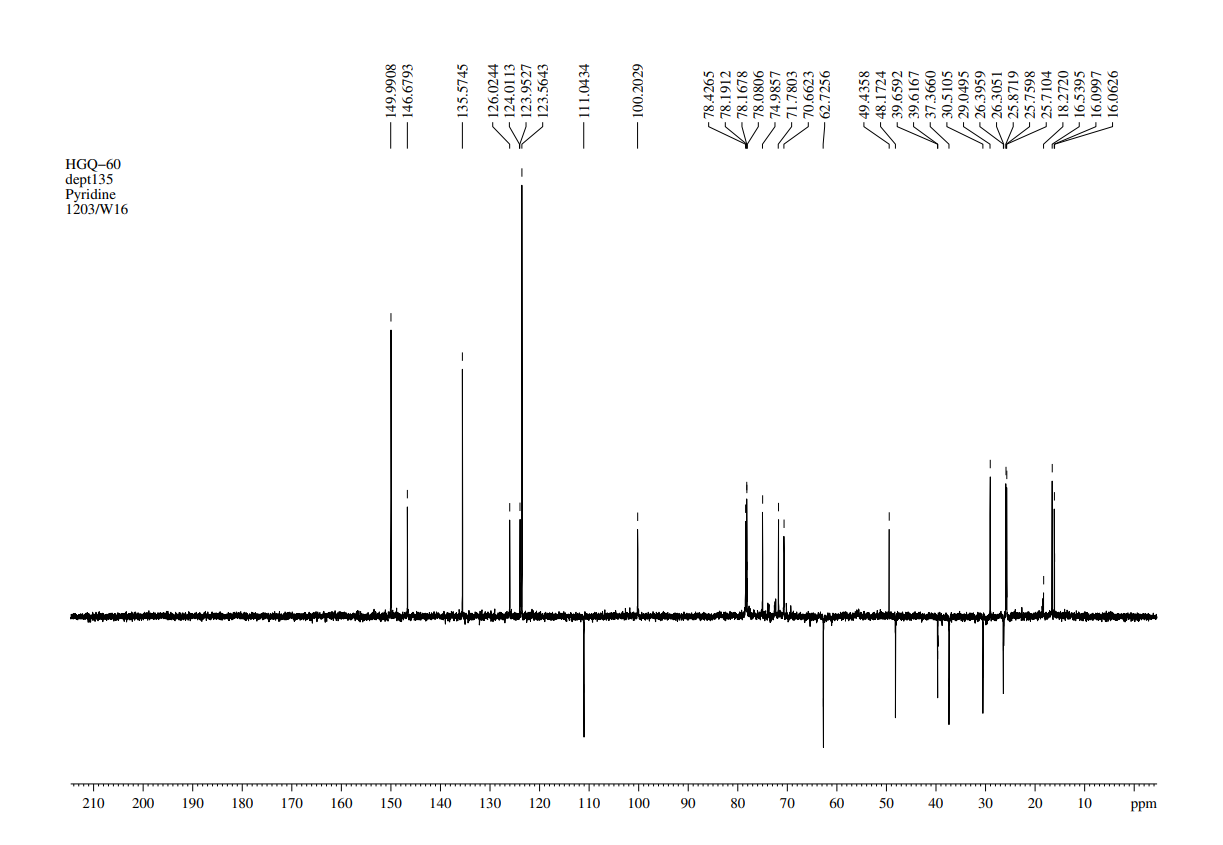


Figure S13. HSQC spectrum of compound **2**


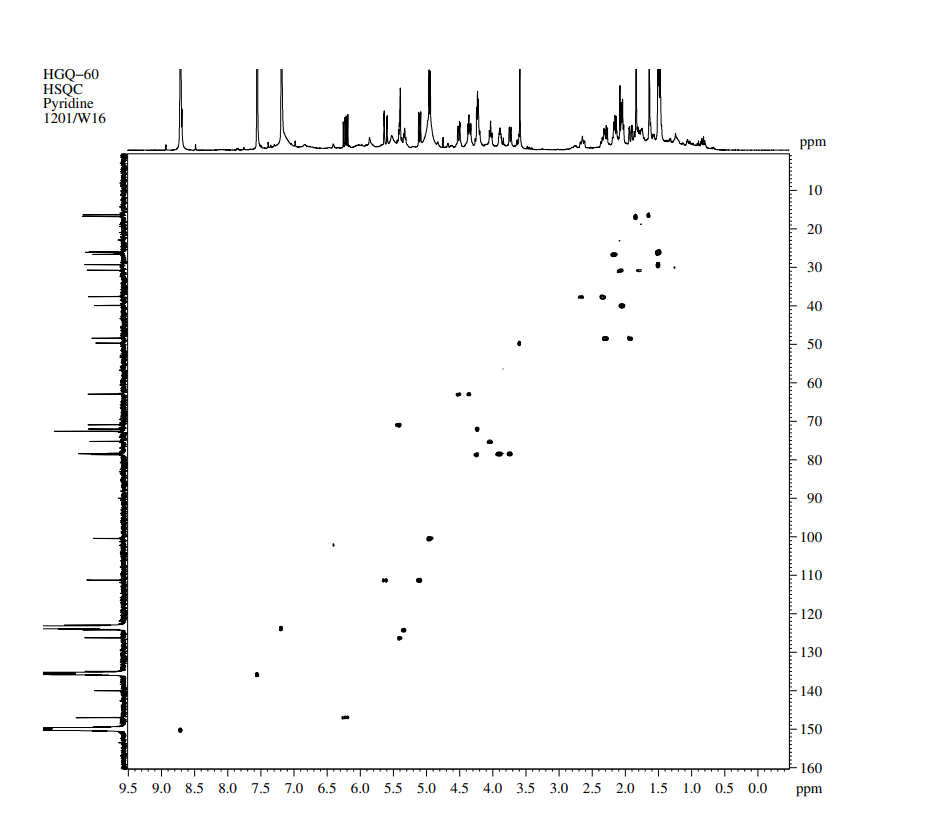


Figure S14. 1H-1H COSY spectrum of compound **2**


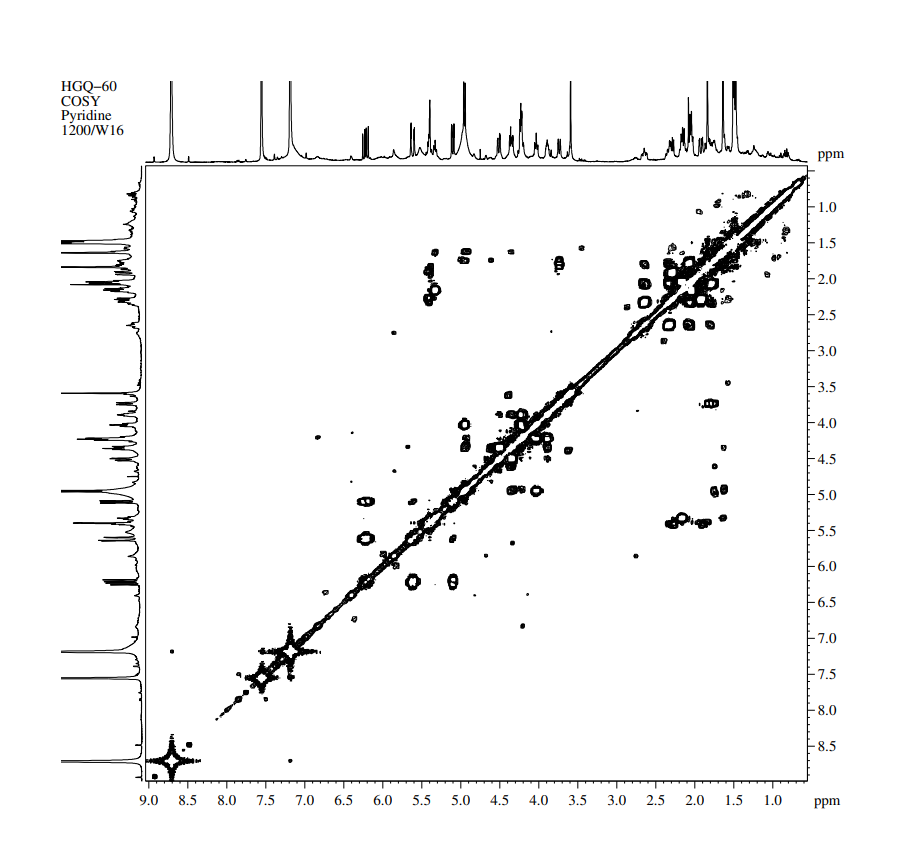


Figure S15. HMBC spectrum of compound **2**


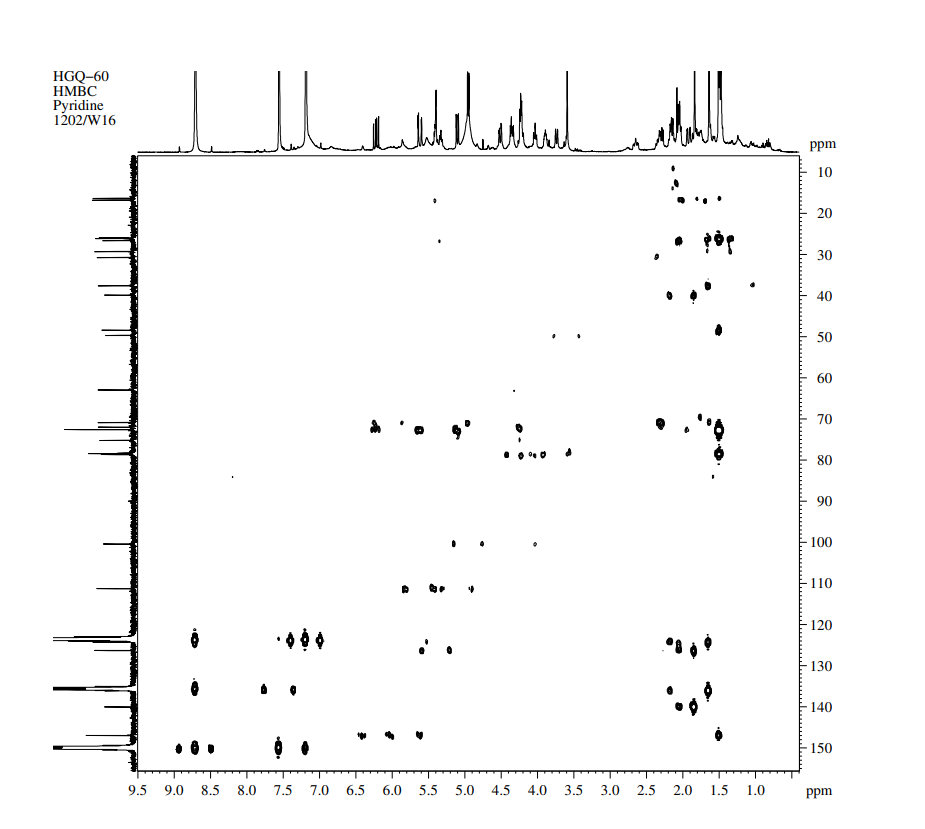


Figure S16. Chemical structures of compounds **3**-**11**
